# Supplementary material
Source: Springer Nature journal article supplement (https://www.springermedizin.de/resource/supplementary/12936_2011_1814_MOESM1_ESM.pdf/9541798)

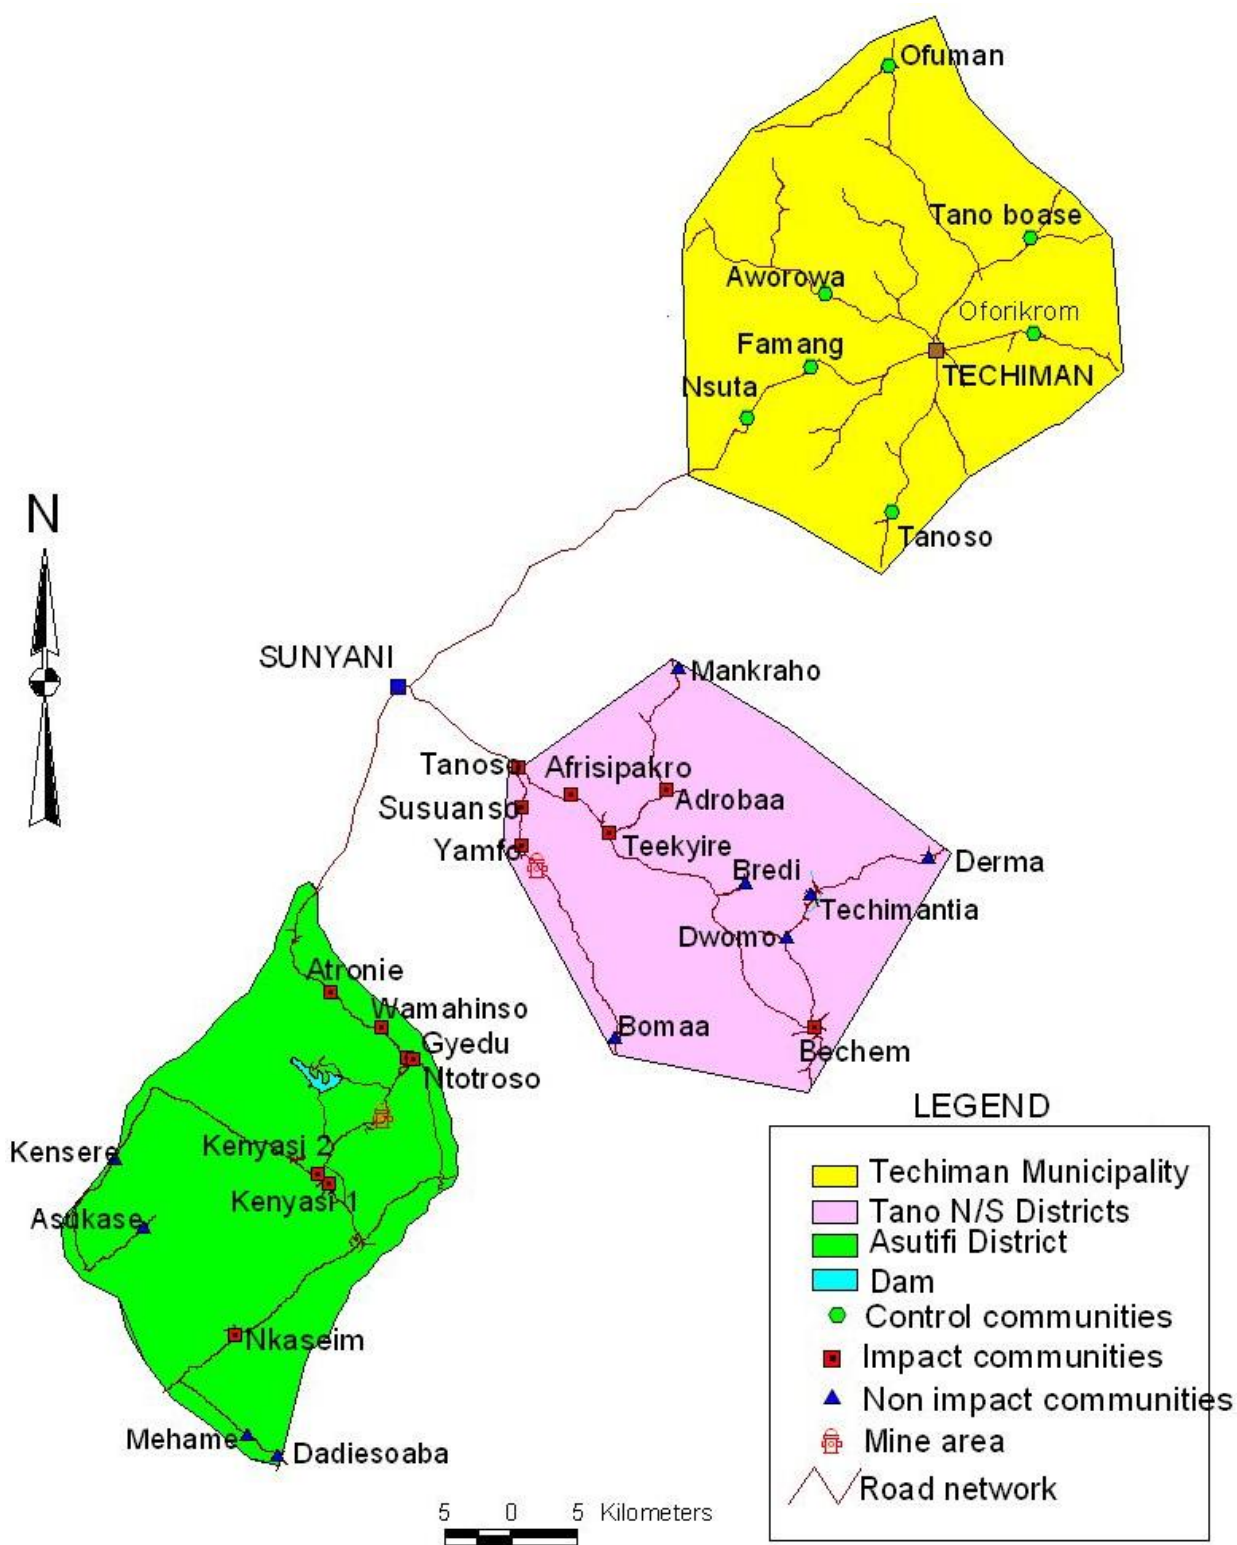

N

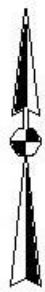

SUNYANI

**LEGEND**

- Techiman Municipality
- Tano N/S Districts
- Asutifi District
- Dam
- Control communities
- Impact communities
- Non impact communities
- Mine area
- Road network

5 0 5 Kilometers

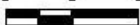

Supplement: MOESM1 [file 9541798]
